# Supplementary material
Source: publisher figshare collection journal article supplement (https://tandf.figshare.com/articles/dataset/_/24097968)
Supplement: Supplementary file 1 [file 1]

**Supplementary materials**

**
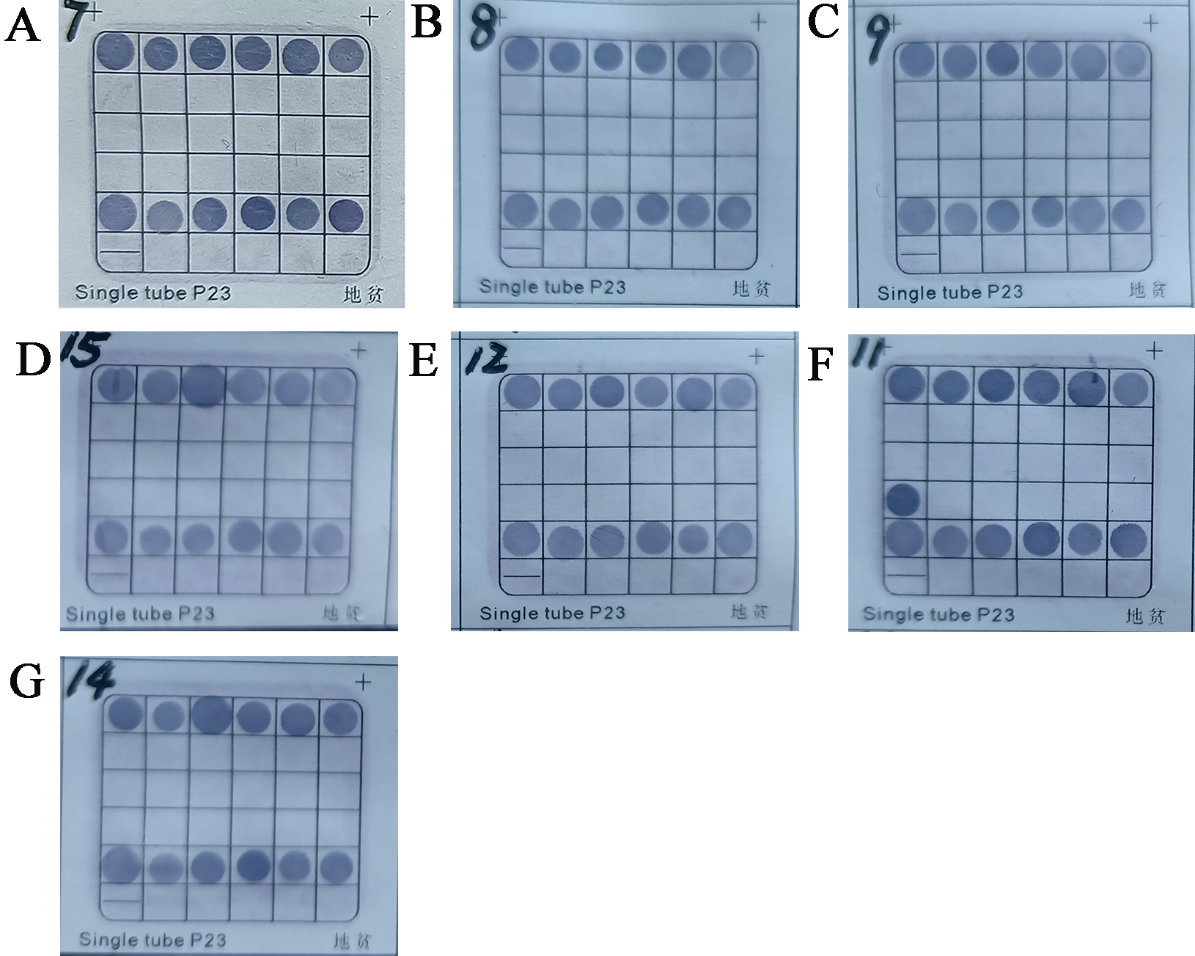
**

**Figure S1 Results of common thalassemia gene detection of the family pedigree members. A,** proband’s father; **B,** proband’s mother; **C,** proband’s elder sister; **D,** elder sister’s son; **E,** proband; **F,** proband’s husband; **G,** proband’s daughter


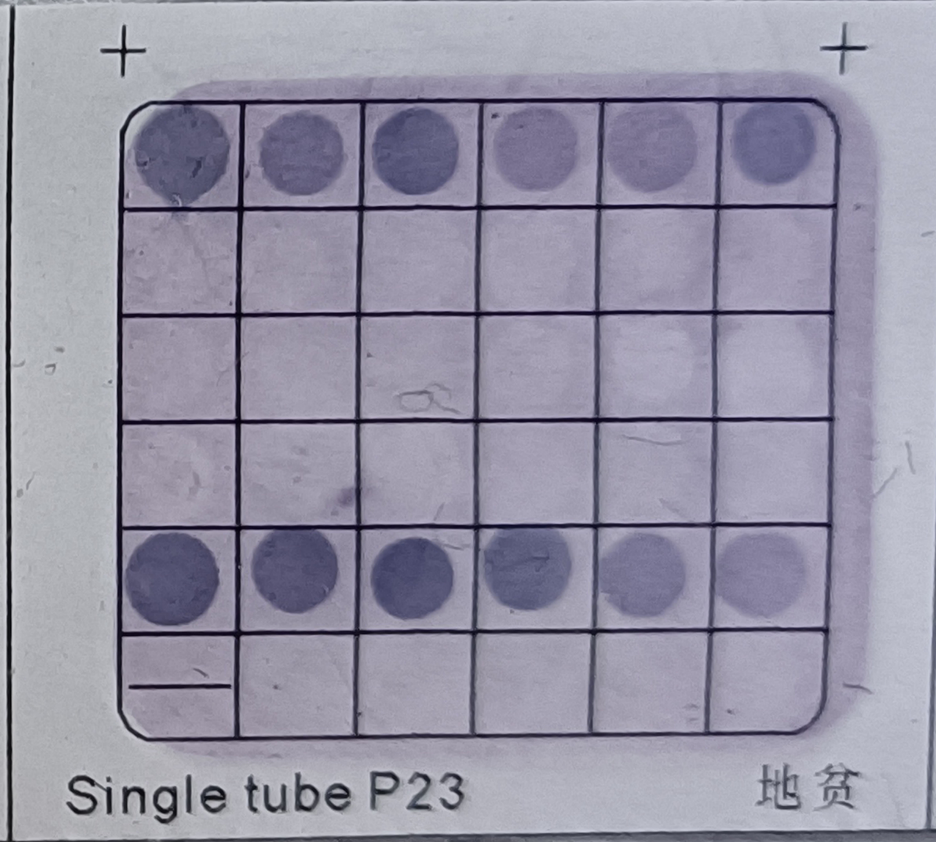


**Figure S2 Detection of the common thalassemia genes for the fetus**
